# Supplementary material for: PS1/γ‐Secretase‐Mediated Cadherin Cleavage Induces β‐Catenin Nuclear Translocation and Osteogenic Differentiation of Human Bone Marrow Stromal Cells
Source: Hindawi journal article supplement (doi:10.1155/2016/3865315), 2016-01-01

**A**

MDA-MB-231

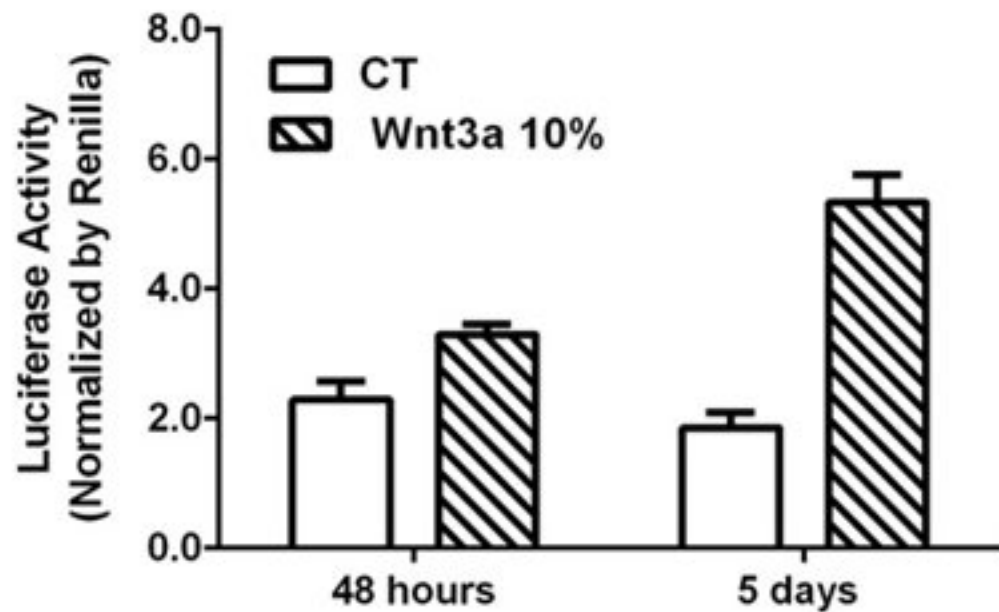**B**

MDA-MB-231

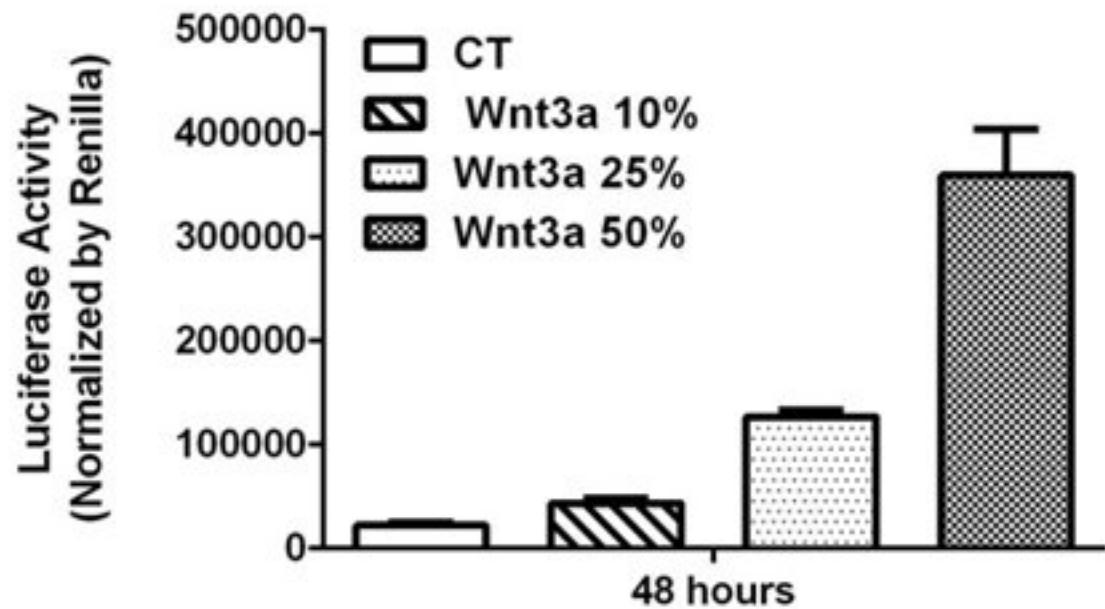

Supplement: f2 [file 3865315.f2.pdf]
